# Supplementary material for: Alterations of the gut microbiota in type 2 diabetics with or without subclinical hypothyroidism
Source: PeerJ. 2023 Apr 13;11:e15193. doi: 10.7717/peerj.15193 (PMC10106085; doi:10.7717/peerj.15193)
Supplement: Supplemental Information 5 [file peerj-11-15193-s005.xlsx]

## Sheet: sample ID and basic information
ID-stool	ID-patient	Group	height	weight	BMI	Age	Sex	Sex:1=male 2=female
A1	T2D-1	1	180	62	19.1358	61	1
A2	T2D-2	1	172	71	23.9995	45	1
A3	T2D-3	1	162	75	28.578	64	2
A4	T2D-4	1	160	75	29.2969	57	1
A6	T2D-6	1	173	83	27.7323	57	1
A7	T2D-7	1	178	85	26.8274	65	1
A8	T2D-8	1	172	75	25.3515	42	1
A10	T2D-10	1	164	73	27.1416	62	1
A11	T2D-11	1	164	67	24.9108	58	2
A12	T2D-12	1	157	52	21.0962	59	2
A13	T2D-13	1	159	51	20.1733	50	2
A14	T2D-14	1	178	86	27.143	42	1
A15	T2D-15	1	173	83	27.7323	52	1
A16	T2D-16	1	152	55	23.8054	61	2
A17	T2D-17	1	169	75	26.2596	64	1
A18	T2D-18	1	173	75	25.0593	58	1
A19	T2D-19	1	172	81	27.3797	49	1
A20	T2D-20	1	160	71	27.7344	39	2
A21	T2D-21	1	169	73	25.5593	50	2
A22	T2D-22	1	170	81	28.0277	62	1
A23	T2D-23	1	178	80	25.2493	63	1
A24	T2D-24	1	171	82	28.0428	42	1
A25	T2D-25	1	172	67	22.6474	47	1
A26	T2D-26	1	163	57	21.4536	42	1
A27	T2D-27	1	162	65	24.7676	59	2
A28	T2D-28	1	164	74	27.5134	66	2
A29	T2D-29	1	172	68	22.9854	30	1
A30	T2D-30	1	175	71	23.1837	52	1
A31	T2D-31	1	178	57	17.9902	60	1
A32	T2D-32	1	158	60	24.0346	61	2
B-1	T2D-SCH-1	2	169	73	25.5593	44	2
B-3	T2D-SCH-3	2	163	61	22.9591	66	1
B-4	T2D-SCH-4	2	158	60	24.0346	38	1
B-5	T2D-SCH-5	2	177	80	25.5354	44	1
B-7	T2D-SCH-7	2	175	84	27.4286	48	1
B-8	T2D-SCH-8	2	167	97	34.7807	30	2
B-9	T2D-SCH-9	2	167	70	25.0995	63	2
B-10	T2D-SCH-10	2	155	57	23.7253	50	2
B-11	T2D-SCH-11	2	165	67	24.6097	59	2
B-12	T2D-SCH-12	2	172	74	25.0135	58	1
B-14	T2D-SCH-14	2	172	70	23.6614	62	1
B-15	T2D-SCH-15	2	170	70	24.2215	48	1
B-16	T2D-SCH-16	2	158	60	24.0346	44	2
B-17	T2D-SCH-17	2	165	72	26.4463	51	2
B-18	T2D-SCH-18	2	168	70	24.8016	53	1
C-1	C-1	3	181	89	27.1664	46	1
C-2	C-2	3	177	89	28.4082	44	1
C-3	C-3	3	170	68	23.5294	51	1
C-4	C-4	3	160	63	24.6094	54	2
C-5	C-5	3	175	70	22.8571	50	1
C-6	C-6	3	167	70	25.0995	57	1
C-7	C-7	3	173	76	25.3934	57	1
C-8	C-8	3	166	71	25.7657	53	1
C-9	C-9	3	173	75	25.0593	58	1
C-10	C-10	3	163	59	22.2063	45	2
C-12	C-12	3	162	60	22.8624	35	2
C-13	C-13	3	160	60	23.4375	54	2
C-14	C-14	3	153	53	22.6409	52	2
C-15	C-15	3	165	61	22.4059	40	2
C-16	C-16	3	167	76	27.2509	48	2
